# Supplementary material for: 26SCS-Loaded SilMA/Col Composite Sponge with Well-Arranged Layers Promotes Angiogenesis-Based Diabetic Wound Repair by Mediating Macrophage Inflammatory Response
Source: MDPI journal article supplement (doi:10.3390/molecules29081832), 2024-04-17
Supplement: s1 [file s1]

## Supporting Information

### 1. Supplementary Data

#### 1.1 The layer spacing of SilMA/Col sponges

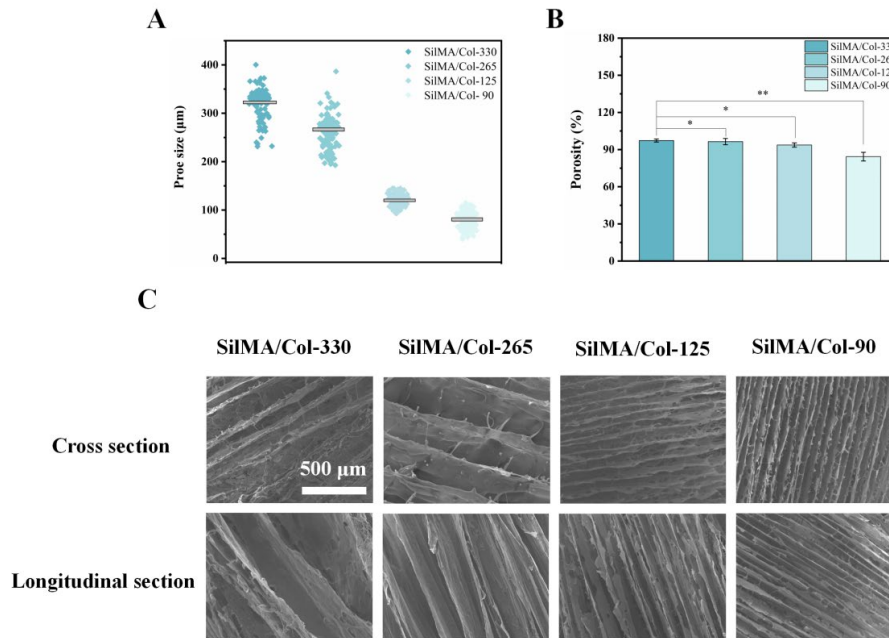

**Figure S1.** (A) The layer spacing of sponges. (B) The porosity of sponges detected by ethanol immersion method. (C) The SEM images of SilMA/Col sponges. \* $P < 0.05$ , \*\* $P < 0.01$ , \*\*\* $P < 0.001$ .

#### 1.2 Data on co-culture of cell with SilMA/Col sponges

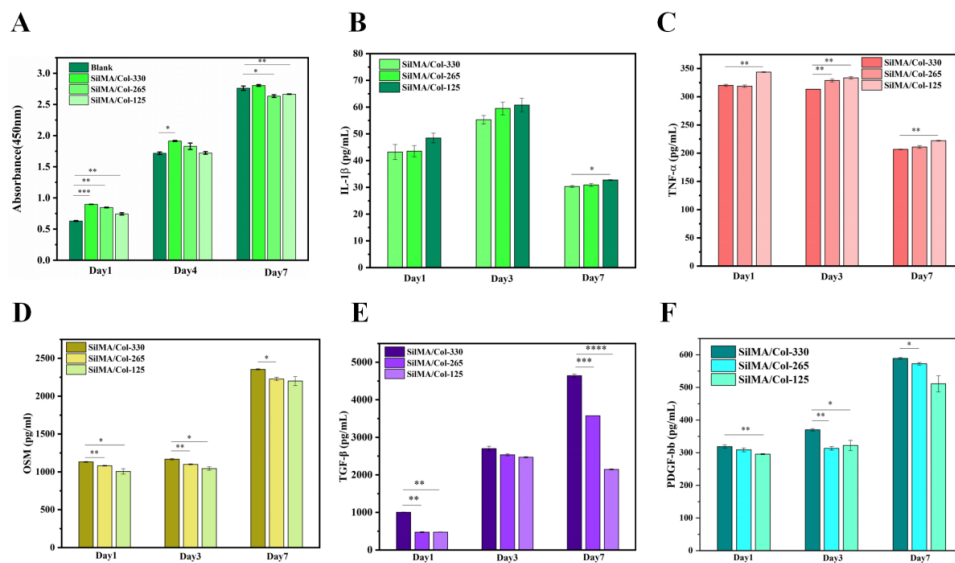

**Figure S2.** (A) The cell proliferation of SilMA/Col sponges. (B)~(C) The expression of

pro-inflammatory genes IL-1 $\beta$ , TNF- $\alpha$ . (D)~(E) The expression of anti-inflammatory genes OSM and TNF- $\beta$ . (F) The expression of angiogenesis gene PDGF-BB. \* $P<0.05$ , \*\* $P<0.01$ , \*\*\* $P<0.001$ .

### 1.3 Evaluation of fiber orientation in composite sponges

In order to characterize the fiber orientation in composite sponges, several regions were randomly selected and Image J was used to calculate the angle between the fiber orientation and the horizontal direction. The order parameter (S) is introduced to quantify the fiber orientation in sponges. An S value of 1 indicates that the fiber orientation in the sponge is completely consistent, and an S value of 0 indicates that the fiber orientation is completely disordered. The closer S is to 1, the higher the degree of orientation. The calculation method of ordered parameters is mainly referred to DOI: 10.27012 / , dc nki. Gdhuu. 2023.000077.

As could be seen from Fig.S3, the S of all PLGA-based fiber scaffolds was greater than 0.9, indicating that the fibers in the scaffolds were highly oriented and neatly arranged.

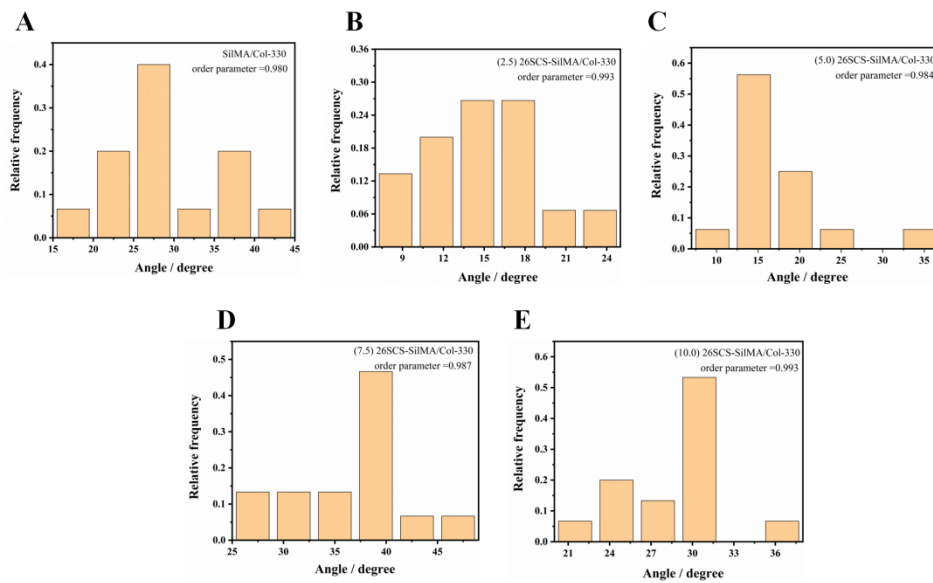

**Fig.S3** The orientation of sponges with different 26SCS loads.

#### 1.4 Cytotoxicity grading criteria

The cytotoxicity grading standards used for cytotoxicity evaluation are shown in Table.S1. RGR is calculated as follows:

$$RGR = \frac{A_1}{A_0} \times 100\%$$

where  $A_1$  is absorbance of the experimental group after 48 h culture and  $A_0$  is absorbance of control group after 48 h culture.

Table.S1 Cytotoxicity Grading Evaluation Criteria

| RGR   | Cytotoxicity (CTS) | Evaluation |
|-------|--------------------|------------|
| 75-99 | I                  | None       |
| 50-74 | II                 | Mild       |
| 25-49 | III                | Moderate   |
| 1-24  | IV                 | Moderate   |
| 0     | V                  | Severe     |
